# Supplementary material for: Fine particulate matter from burning oil and gas and associated neurological symptoms among Deepwater Horizon oil spill cleanup workers
Source: Royal Society of Chemistry journal article supplement (doi:10.1039/d4em00469h), 2025-01-01
Supplement: d4em00469h1.pdf [file d4em00469h1.pdf]

## SUPPLEMENTARY INFORMATION

### Fine particulate matter from burning oil and gas and neurological symptoms among oil spill cleanup workers during cleanup and 1-3 years later

Christina L. Norris,<sup>a</sup> Dale P. Sandler,<sup>b</sup> Gregory C. Pratt,<sup>c</sup> Mark R. Stenzel,<sup>d</sup> Patricia A. Stewart,<sup>e</sup> W. Braxton Jackson II,<sup>f</sup> Kate E. Christenbury,<sup>f</sup> Emily J. Werder,<sup>b</sup> Caroline P. Groth,<sup>g</sup> Sudipto Banerjee,<sup>h</sup> Kaitlyn G. Lawrence,<sup>b</sup> Lawrence S. Engel<sup>a,b</sup>

<sup>a</sup> Department of Epidemiology, Gillings School of Global Public Health, University of North Carolina at Chapel Hill, Chapel Hill, North Carolina, USA

<sup>b</sup> Epidemiology Branch, National Institute of Environmental Health Sciences, Research Triangle Park, North Carolina, USA

<sup>c</sup> Division of Environmental Health, School of Public Health, University of Minnesota, Minneapolis, Minnesota, USA

<sup>d</sup> Exposure Assessment Applications, LLC, Arlington, Virginia, USA

<sup>e</sup> Stewart Exposure Assessments, LLC, Arlington, Virginia, USA

<sup>f</sup> Social & Scientific Systems, Inc., Durham, North Carolina, USA

<sup>g</sup> Department of Epidemiology and Biostatistics, West Virginia University School of Public Health, Morgantown, WV, USA

<sup>h</sup> Department of Biostatistics, University of California-Los Angeles Fielding School of Public Health, Los Angeles, CA, USA

**Corresponding author:** Lawrence Engel, Department of Epidemiology, Gillings School of Global Public Health, University of North Carolina at Chapel Hill, CB #7435, Chapel Hill, NC 27599, Phone: (919) 962-2756, larry.engel@unc.edu.

**Conflicts of interest:** *The authors declare they have nothing to disclose.*

**Figures/Tables**

**Table A1.** Summary metrics for average and cumulative maximum daily exposure to burning/flaring-related PM<sub>2.5</sub> for oil spill cleanup and response workers not missing data on symptoms during the DWH disaster (n=9,044).

|                                          | <b>N (%)</b> | <b>Concentration</b>                     |
|------------------------------------------|--------------|------------------------------------------|
| <b>Average maximum daily exposure</b>    |              |                                          |
|                                          |              | ( $\mu\text{g}/\text{m}^3$ )             |
| Referent                                 | 7066 (78.1)  | <1                                       |
| <i>In situ</i> burn workers (low)        | 41 (0.5)     | 10                                       |
| Hot zone/source workers (low)            | 1628 (18.0)  | 29                                       |
| Hot zone workers (high)                  | 309 (3.4)    | 97                                       |
| <b>Cumulative maximum daily exposure</b> |              |                                          |
|                                          |              | <i>Range [median]</i>                    |
|                                          |              | ( $\mu\text{g}/\text{m}^3\text{-days}$ ) |
| Referent                                 | 7066 (78.1)  | <1 [0]                                   |
| Low                                      | 591 (6.5)    | 10 – 679 [86]                            |
| Medium                                   | 604 (6.7)    | 689 – 1378 [689]                         |
| High                                     | 783 (8.7)    | 1406 – 4071 [1406]                       |

**Table A2.** Summary metrics for average and cumulative maximum daily exposure to burning/flaring-related PM<sub>2.5</sub> for oil spill cleanup and response workers not missing data on symptoms 1-3 years after the DWH disaster (n=9,274).

|                                          | <b>N (%)</b> | <b>Concentration</b>                     |
|------------------------------------------|--------------|------------------------------------------|
| <b>Average maximum daily exposure</b>    |              |                                          |
|                                          |              | ( $\mu\text{g}/\text{m}^3$ )             |
| Referent                                 | 7240 (78.1)  | <1                                       |
| <i>In situ</i> burn workers (low)        | 42 (0.5)     | 10                                       |
| Hot zone/source workers (low)            | 1679 (18.1)  | 29                                       |
| Hot zone workers (high)                  | 313 (3.4)    | 97                                       |
| <b>Cumulative maximum daily exposure</b> |              |                                          |
|                                          |              | <i>Range [median]</i>                    |
|                                          |              | ( $\mu\text{g}/\text{m}^3\text{-days}$ ) |
| Referent                                 | 7240 (78.1)  | <1 [0]                                   |
| Low                                      | 609 (6.6)    | 10 – 679 [86]                            |
| Medium                                   | 619 (6.7)    | 689 – 1378 [689]                         |
| High                                     | 806 (8.7)    | 1406 – 4071 [1406]                       |

**Table A3.** Characteristics of the analytic study population (n=9,914) by PM<sub>2.5</sub> exposure group. Gender, smoking, alcohol, education, race, ethnicity, age, and body mass index data were collected at enrollment.

|                                        | Cumulative PM <sub>2.5</sub> exposure |                      |                      |                      | Average PM <sub>2.5</sub> exposure |                 |                 |
|----------------------------------------|---------------------------------------|----------------------|----------------------|----------------------|------------------------------------|-----------------|-----------------|
|                                        | Referent<br>(n=7849)                  | Tertile 1<br>(n=622) | Tertile 2<br>(n=629) | Tertile 3<br>(n=814) | Referent<br>(n=7849)               | Low<br>(n=1750) | High<br>(n=315) |
|                                        | <u>n (%)</u>                          |                      |                      |                      | <u>n (%)</u>                       |                 |                 |
| <b>Gender</b>                          |                                       |                      |                      |                      |                                    |                 |                 |
| Female                                 | 761 (9.7)                             | 66 (10.6)            | 63 (10.0)            | 46 (5.7)             | 761 (9.7)                          | 160 (9.1)       | 15 (4.8)        |
| Male                                   | 7088 (90.3)                           | 556 (89.4)           | 566 (90.0)           | 768 (94.4)           | 7088 (90.3)                        | 1590 (90.9)     | 300 (95.2)      |
| Missing                                | 0                                     | 0                    | 0                    | 0                    | 0                                  | 0               | 0               |
| <b>Lifetime smoking</b>                |                                       |                      |                      |                      |                                    |                 |                 |
| Heavy current smoker                   | 942 (13.0)                            | 48 (8.0)             | 59 (9.5)             | 91 (11.4)            | 942 (13.0)                         | 173 (10.1)      | 25 (8.0)        |
| Light current smoker                   | 1429 (19.7)                           | 161 (26.7)           | 141 (22.7)           | 197 (24.6)           | 1429 (19.7)                        | 428 (25.0)      | 71 (22.8)       |
| Former smoker                          | 1667 (22.9)                           | 108 (17.9)           | 124 (20.0)           | 158 (19.7)           | 1667 (22.9)                        | 321 (18.7)      | 69 (22.2)       |
| Never smoker                           | 3230 (44.4)                           | 287 (47.5)           | 296 (47.7)           | 356 (44.4)           | 3230 (44.4)                        | 793 (46.2)      | 146 (47.0)      |
| Missing (n)                            | 581                                   | 18                   | 9                    | 12                   | 581                                | 35              | 4               |
| <b>Lifetime consumption of alcohol</b> |                                       |                      |                      |                      |                                    |                 |                 |
| Current drinker                        | 5665 (77.4)                           | 474 (77.6)           | 486 (77.5)           | 630 (77.7)           | 5665 (77.4)                        | 1347 (77.6)     | 243 (77.4)      |
| Former drinker                         | 1284 (17.5)                           | 94 (15.4)            | 94 (15.0)            | 131 (16.2)           | 1284 (17.5)                        | 271 (15.6)      | 48 (15.3)       |
| Never drinker                          | 373 (5.1)                             | 43 (7.0)             | 47 (7.5)             | 50 (6.2)             | 373 (5.1)                          | 117 (6.7)       | 23 (7.3)        |
| Missing (n)                            | 527                                   | 11                   | 2                    | 3                    | 527                                | 15              | 1               |
| <b>Highest educational attainment</b>  |                                       |                      |                      |                      |                                    |                 |                 |
| Less than high school/equivalent       | 1398 (19.1)                           | 120 (19.6)           | 103 (16.4)           | 142 (17.4)           | 1398 (19.1)                        | 320 (18.4)      | 45 (14.3)       |
| High school diploma/GED                | 2256 (30.7)                           | 167 (27.3)           | 220 (35.1)           | 299 (36.7)           | 2256 (30.7)                        | 558 (32.1)      | 128 (40.6)      |
| Some college/2-year degree             | 2229 (30.4)                           | 185 (30.3)           | 197 (31.4)           | 271 (33.3)           | 2229 (30.4)                        | 559 (32.2)      | 94 (29.8)       |
| 4 Year college graduate or more        | 1456 (19.8)                           | 139 (22.8)           | 107 (17.1)           | 102 (12.5)           | 1456 (19.8)                        | 300 (17.3)      | 48 (15.2)       |
| Missing (n)                            | 510                                   | 11                   | 2                    | 0                    | 510                                | 13              | 0               |
| <b>Race</b>                            |                                       |                      |                      |                      |                                    |                 |                 |
| White                                  | 5589 (71.6)                           | 354 (57.2)           | 343 (54.8)           | 460 (56.9)           | 5589 (71.6)                        | 977 (56.2)      | 180 (57.3)      |
| Black                                  | 942 (12.1)                            | 192 (31.0)           | 197 (31.5)           | 268 (33.1)           | 942 (12.1)                         | 555 (31.9)      | 102 (32.5)      |

|                                           |                    |                                  |                     |                      |                    |                                  |                      |
|-------------------------------------------|--------------------|----------------------------------|---------------------|----------------------|--------------------|----------------------------------|----------------------|
| Other                                     | 1278 (16.4)        | 73 (11.8)                        | 86 (13.7)           | 81 (10.0)            | 1278 (16.4)        | 208 (12.0)                       | 32 (10.2)            |
| Missing (n)                               | 40                 | 3                                | 3                   | 5                    | 40                 | 10                               | 1                    |
| <b>Ethnicity</b>                          |                    |                                  |                     |                      |                    |                                  |                      |
| Hispanic                                  | 486 (6.2)          | 55 (8.9)                         | 58 (9.2)            | 54 (6.7)             | 486 (6.2)          | 143 (8.2)                        | 24 (7.6)             |
| Non-Hispanic                              | 7335 (93.8)        | 565 (91.1)                       | 570 (90.8)          | 758 (93.4)           | 7335 (93.8)        | 1603 (91.8)                      | 290 (92.4)           |
| Missing (n)                               | 28                 | 2                                | 1                   | 2                    | 28                 | 4                                | 1                    |
|                                           |                    | <u>Mean (standard deviation)</u> |                     |                      |                    | <u>Mean (standard deviation)</u> |                      |
| <b>Age (years)</b>                        | 42.5 (12.8)        | 38.2 (11.3)                      | 39.0 (11.7)         | 38.6 (11.3)          | 42.5 (12.8)        | 38.4 (11.6)                      | 40.0 (10.8)          |
| Missing (n)                               | 4                  | 0                                | 0                   | 0                    | 4                  | 0                                | 0                    |
| <b>Body mass index (kg/m<sup>2</sup>)</b> | 28.5 (6.2)         | 28.1 (5.5)                       | 28.0 (5.7)          | 28.7 (5.3)           | 28.5 (6.2)         | 28.2 (5.5)                       | 29.0 (5.7)           |
| Missing (n)                               | 564                | 17                               | 6                   | 3                    | 564                | 24                               | 2                    |
| <b>BTEX-H exposure (ppb-days) *</b>       | 7409.7<br>(5410.7) | 8010.6<br>(8620.8)               | 11156.9<br>(9779.5) | 17609.1<br>(13111.1) | 7409.7<br>(5410.7) | 12488.4<br>(11121.4)             | 14220.2<br>(14235.3) |

\*Sum of average daily exposures across all days of work; there are no individuals missing this exposure

**Table A4.** Number of individuals, by gender and overall, who reported experiencing symptoms during the *DWH* disaster and, separately, 1-3 years after the *DWH* disaster. Central nervous system (CNS) symptoms include dizziness, sweating, palpitations, nausea, and migraine; peripheral nervous system (PNS) symptoms include tingling or numbness in extremities, blurred vision, and stumbling.

| Outcome                                 | During <i>DWH</i> disaster |          |           | 1-3 years after <i>DWH</i> disaster |          |           |
|-----------------------------------------|----------------------------|----------|-----------|-------------------------------------|----------|-----------|
|                                         | Female (n)                 | Male (n) | Total (n) | Female (n)                          | Male (n) | Total (n) |
| Any neurological                        | 335                        | 2921     | 3256      | 345                                 | 2547     | 2892      |
| 2 or more neurological                  | 198                        | 1537     | 1735      | 184                                 | 1398     | 1582      |
| Any CNS                                 | 244                        | 1945     | 2189      | 235                                 | 1588     | 1823      |
| 2 or more CNS                           | 115                        | 871      | 986       | 96                                  | 680      | 776       |
| Any PNS                                 | 113                        | 1087     | 1200      | 175                                 | 1455     | 1630      |
| 2 or more PNS                           | 38                         | 308      | 346       | 57                                  | 406      | 463       |
| Blurred vision                          | 49                         | 416      | 465       | 78                                  | 576      | 654       |
| Dizziness                               | 86                         | 595      | 681       | 63                                  | 501      | 564       |
| Fatigue                                 | 220                        | 1676     | 1896      | 182                                 | 1235     | 1417      |
| Migraine(s)                             | 180                        | 1145     | 1325      | 184                                 | 1069     | 1253      |
| Nausea                                  | 60                         | 440      | 500       | 39                                  | 352      | 391       |
| Heart palpitations                      | 38                         | 302      | 340       | 31                                  | 248      | 279       |
| Stumbling                               | 20                         | 241      | 261       | 32                                  | 241      | 273       |
| Excessive sweating                      | 86                         | 1023     | 1109      | 76                                  | 617      | 693       |
| Tingling or numbness in the extremities | 91                         | 812      | 903       | 140                                 | 1151     | 1291      |
| Insomnia*                               | 107                        | 877      | 984       | 84                                  | 585      | 669       |
| Seizure(s)*                             | 13                         | 109      | 122       | 10                                  | 99       | 109       |
| Vomiting*                               | 48                         | 346      | 394       | 70                                  | 488      | 558       |

\*Added to questionnaire after some interviews were already completed.

**Table A5.** Number of individuals, by race, who reported experiencing symptoms during the *DWH* disaster and, separately, 1-3 years after the *DWH* disaster. Central nervous system (CNS) symptoms include dizziness, sweating, palpitations, nausea, and migraine; peripheral nervous system (PNS) symptoms include tingling or numbness in extremities, blurred vision, and stumbling.

| Outcome                                 | During <i>DWH</i> disaster |           |           |             | 1-3 years after <i>DWH</i> disaster |           |           |             |
|-----------------------------------------|----------------------------|-----------|-----------|-------------|-------------------------------------|-----------|-----------|-------------|
|                                         | White (n)                  | Black (n) | Other (n) | Missing (n) | White (n)                           | Black (n) | Other (n) | Missing (n) |
| Any neurological                        | 1949                       | 909       | 382       | 16          | 1721                                | 799       | 357       | 15          |
| 2 or more neurological                  | 898                        | 615       | 213       | 10          | 851                                 | 530       | 194       | 7           |
| Any CNS                                 | 1161                       | 750       | 267       | 11          | 953                                 | 630       | 232       | 8           |
| 2 or more CNS                           | 428                        | 432       | 119       | 7           | 350                                 | 331       | 94        | 1           |
| Any PNS                                 | 656                        | 379       | 158       | 7           | 968                                 | 441       | 211       | 10          |
| 2 or more PNS                           | 140                        | 163       | 42        | 1           | 236                                 | 160       | 63        | 4           |
| Blurred vision                          | 212                        | 182       | 69        | 2           | 348                                 | 203       | 99        | 4           |
| Dizziness                               | 266                        | 326       | 85        | 4           | 246                                 | 237       | 80        | 1           |
| Fatigue                                 | 1172                       | 518       | 197       | 9           | 840                                 | 409       | 162       | 6           |
| Migraine(s)                             | 689                        | 464       | 163       | 9           | 637                                 | 454       | 155       | 7           |
| Nausea                                  | 212                        | 215       | 70        | 3           | 188                                 | 155       | 48        | 0           |
| Heart palpitations                      | 150                        | 142       | 46        | 2           | 141                                 | 107       | 30        | 1           |
| Stumbling                               | 129                        | 103       | 28        | 1           | 137                                 | 107       | 27        | 2           |
| Excessive sweating                      | 563                        | 434       | 108       | 4           | 316                                 | 300       | 76        | 1           |
| Tingling or numbness in the extremities | 482                        | 305       | 110       | 6           | 773                                 | 346       | 162       | 10          |
| Insomnia*                               | 657                        | 182       | 139       | 6           | 430                                 | 121       | 115       | 3           |
| Seizure(s)*                             | 65                         | 33        | 24        | 0           | 62                                  | 25        | 22        | 0           |
| Vomiting*                               | 179                        | 163       | 51        | 1           | 289                                 | 196       | 72        | 1           |

\* Added to questionnaire after some interviews were already completed.

**Table A6.** Distribution of symptoms experienced by time point. For each symptom, the group (i.e., only during the *DWH* disaster; only 1-3 years after the *DWH* disaster; at both times) with the highest frequency is **bolded** as this was identified as the most common trajectory for that symptom.

| Outcome                                 | Prevalence of symptom by time of experience (n [%]) |                                                               |                                    | Prevalence of symptom persistence (%) * | Most common symptom trajectory identified |
|-----------------------------------------|-----------------------------------------------------|---------------------------------------------------------------|------------------------------------|-----------------------------------------|-------------------------------------------|
|                                         | Only during <i>DWH</i> disaster ( <i>Resolved</i> ) | Only 1-3 years after <i>DWH</i> disaster ( <i>New onset</i> ) | At both times ( <i>Persisted</i> ) |                                         |                                           |
| Blurred vision                          | 163 (0.22)                                          | <b>331 (0.44)</b>                                             | 260 (0.34)                         | 0.61                                    | <i>New onset</i>                          |
| Dizziness                               | <b>379 (0.42)</b>                                   | 264 (0.29)                                                    | 252 (0.28)                         | 0.40                                    | <i>Resolved</i>                           |
| Fatigue                                 | <b>954 (0.42)</b>                                   | 485 (0.22)                                                    | 809 (0.36)                         | 0.46                                    | <i>Resolved</i>                           |
| Tingling or numbness in the extremities | 273 (0.19)                                          | <b>630 (0.43)</b>                                             | 565 (0.38)                         | 0.67                                    | <i>New onset</i>                          |
| Migraine                                | 489 (0.3)                                           | 418 (0.25)                                                    | <b>741 (0.45)</b>                  | 0.60                                    | <i>Persisted</i>                          |
| Stumbling while walking                 | 146 (0.37)                                          | <b>154 (0.39)</b>                                             | 100 (0.25)                         | 0.41                                    | <i>New onset</i>                          |
| Heart palpitations                      | <b>203 (0.44)</b>                                   | 140 (0.3)                                                     | 118 (0.26)                         | 0.37                                    | <i>Resolved</i>                           |
| Excessive sweating                      | <b>634 (0.5)</b>                                    | 217 (0.17)                                                    | 418 (0.33)                         | 0.40                                    | <i>Resolved</i>                           |
| Nausea                                  | <b>293 (0.44)</b>                                   | 195 (0.3)                                                     | 171 (0.26)                         | 0.37                                    | <i>Resolved</i>                           |
| Insomnia                                | 352 (0.38)                                          | 195 (0.21)                                                    | <b>387 (0.41)</b>                  | 0.52                                    | <i>Persisted</i>                          |
| Seizures                                | <b>67 (0.4)</b>                                     | 53 (0.32)                                                     | 47 (0.28)                          | 0.41                                    | <i>Resolved</i>                           |
| Vomiting                                | 165 (0.24)                                          | <b>323 (0.47)</b>                                             | 198 (0.29)                         | 0.55                                    | <i>New onset</i>                          |

\*Among participants who reported the symptom at the time of the spill.

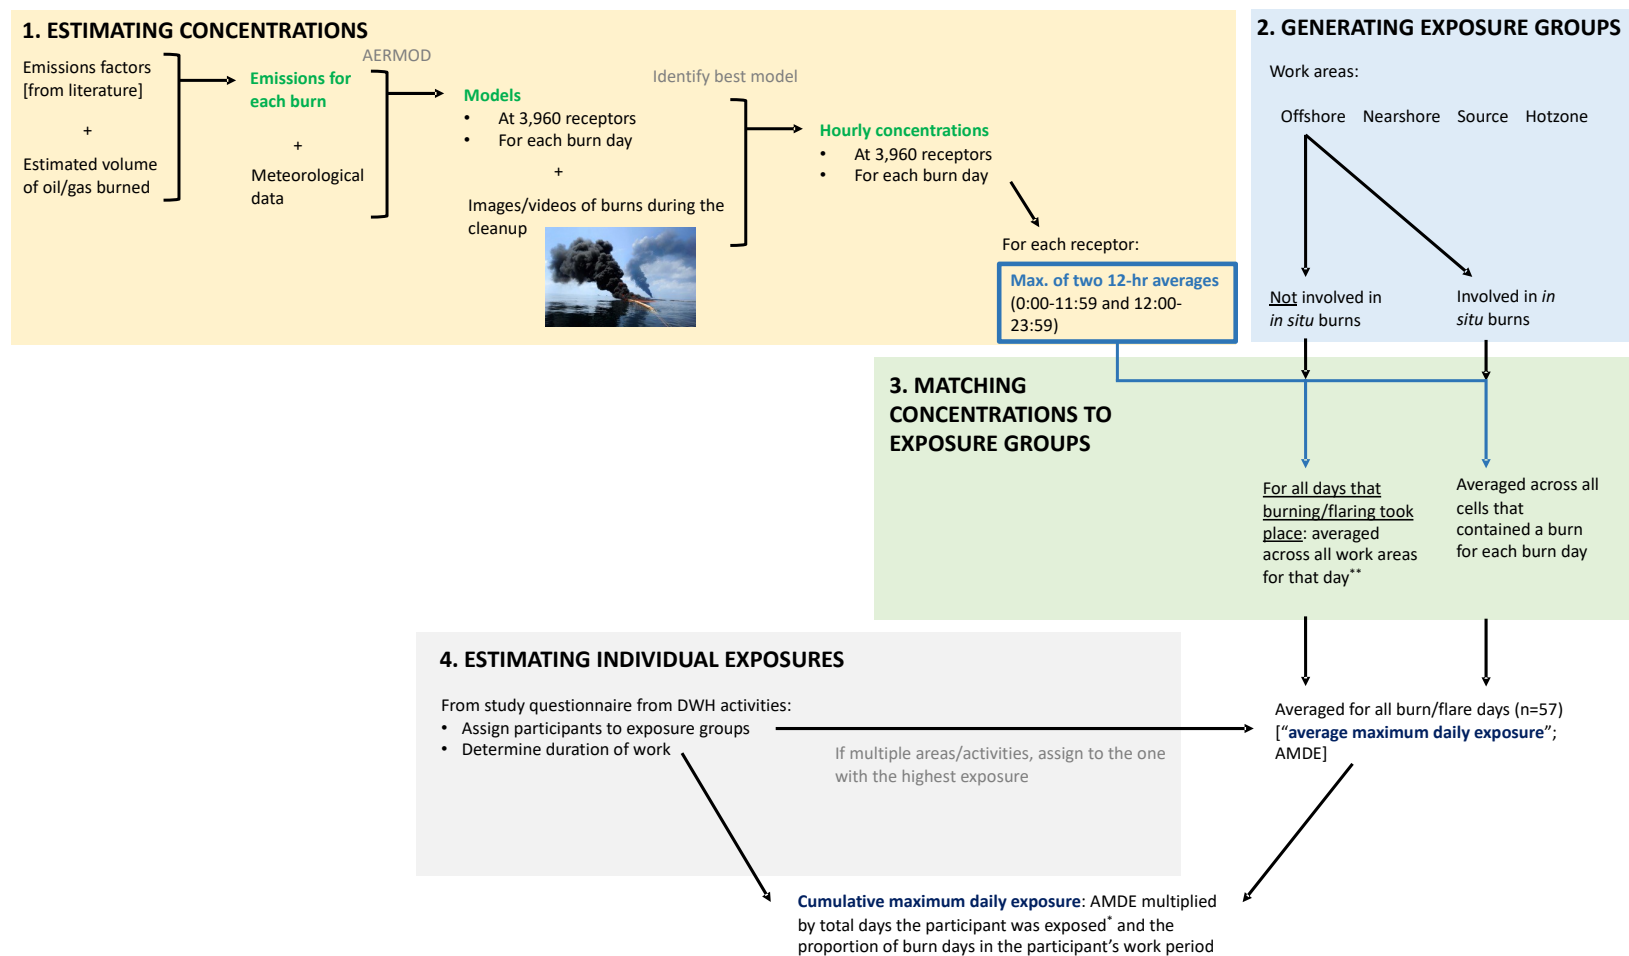

**Figure A1.** Schematic of how PM<sub>2.5</sub> exposures were estimated for individuals included in analysis. Black text indicates data inputs or details about the data, green text indicates an output generated from the previous step in the schematic and in blue are the exposure metrics included in the exposure assessment database. \*The total days a person was exposed was estimated as end date of work minus start date of work; \*\*This action was undertaken for the hot zone and hot zone/source as well. "Receptors" are locations in the Gulf.



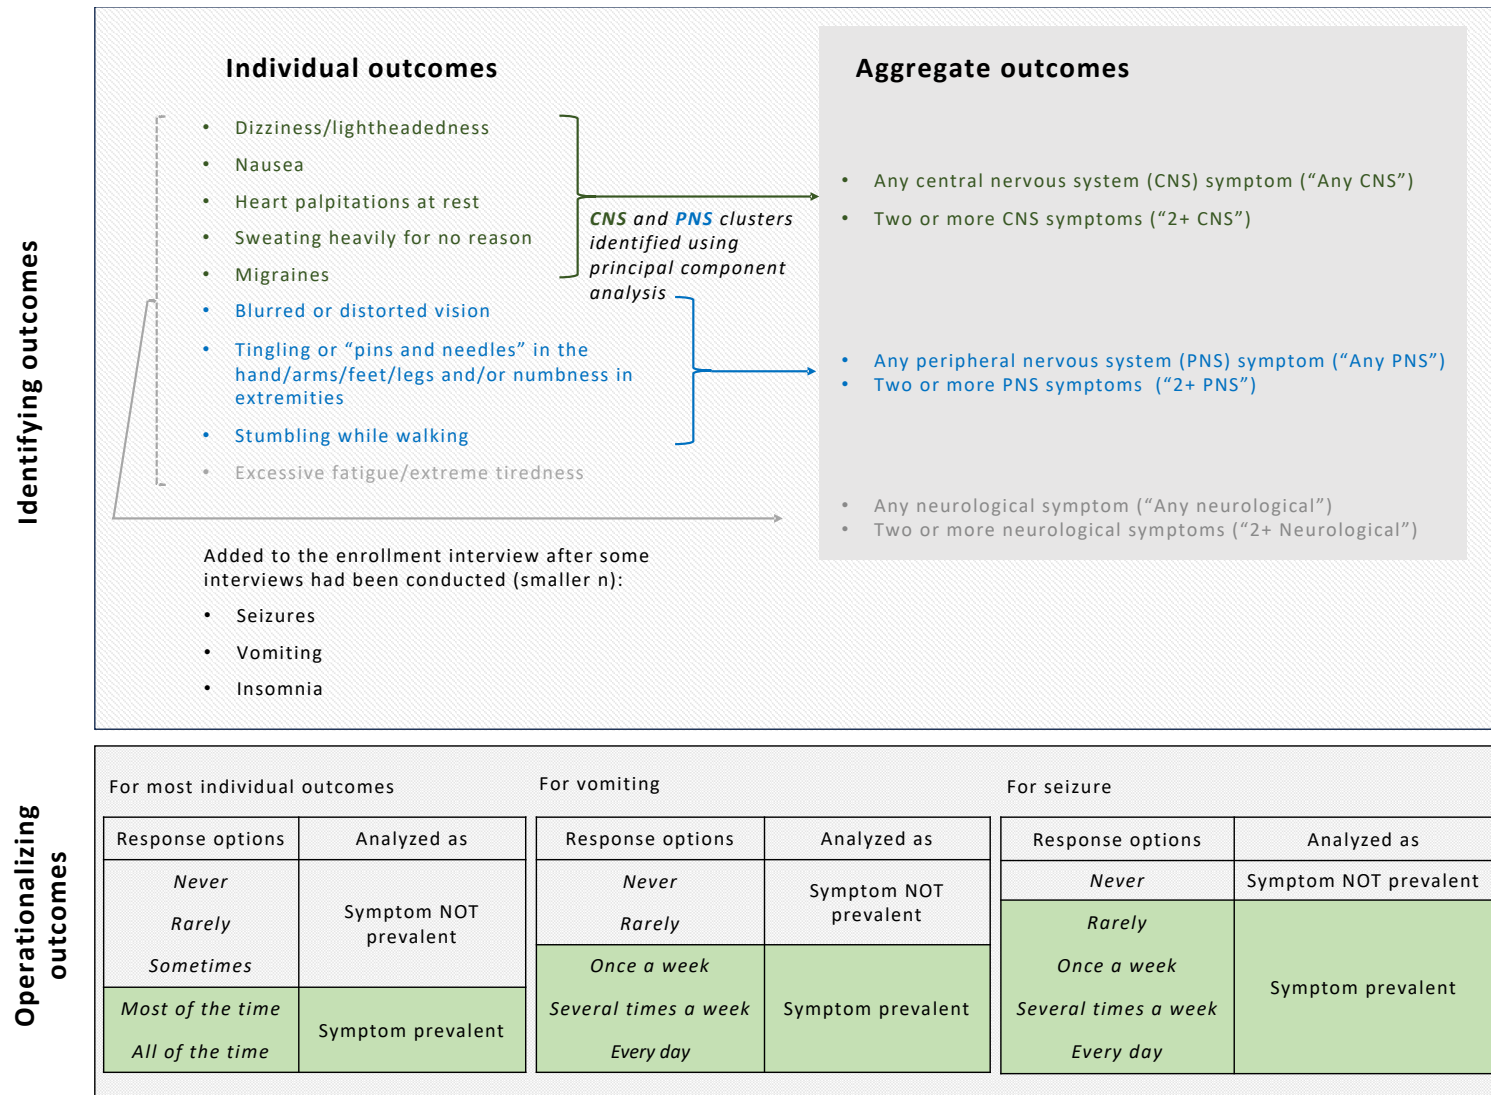

**Figure A2.** Overview of how the outcomes were defined and operationalized for analysis based on the responses of individuals to questions about their experience of 12 individual symptoms during the *DWH* disaster and 1-3 years after the *DWH* disaster. Questions about these symptoms were asked in the enrollment interview

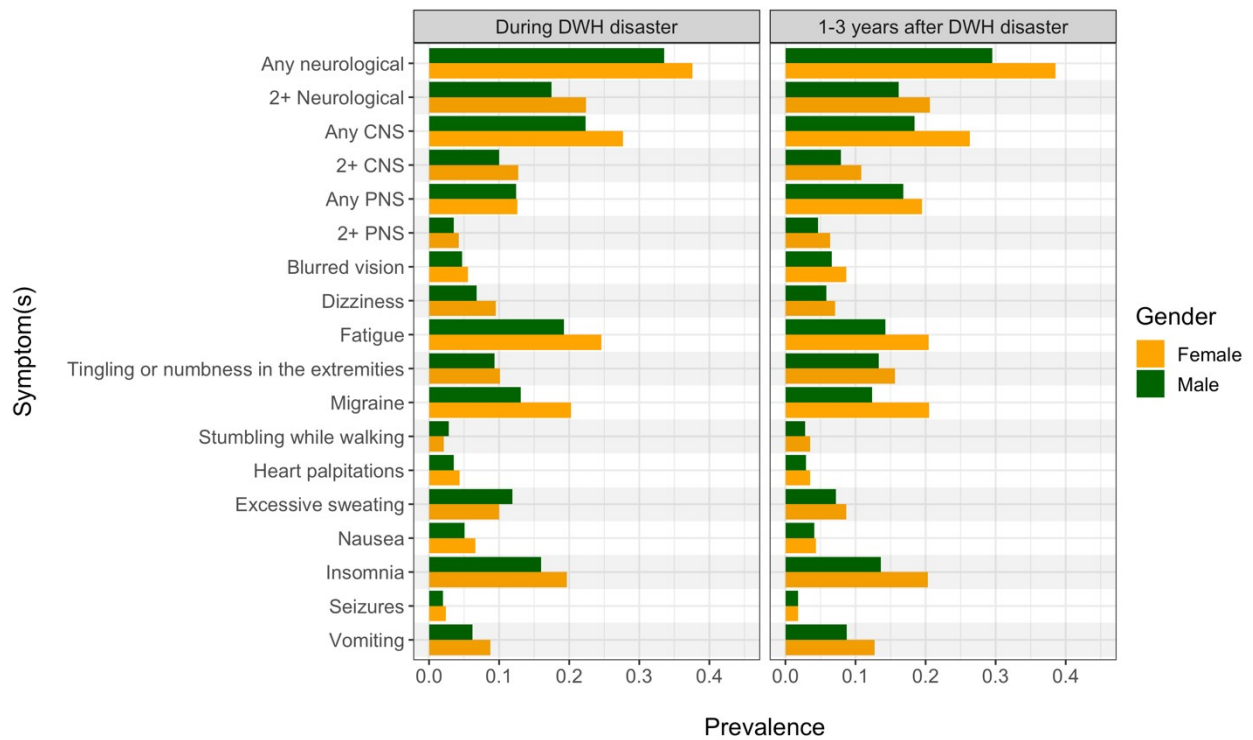

**Figure A3.** Prevalence of the outcomes (individual symptoms and aggregate outcomes) experienced during the *DWH* disaster (denominator n=9,044) and 1-3 years after the *DWH* disaster (denominator n=9,274), by gender (male, female). Data on insomnia, seizures and vomiting were not ascertained for all participants, thus a different denominator was used (during *DWH* disaster: seizure – 6,109; vomit – 6,106; insomnia – 6,040; 1-3 years after disaster: seizure - 6,110; vomit – 6,121; insomnia – 4,701). CNS (central nervous system) symptoms include dizziness, sweating, palpitations, nausea, and migraine. PNS (peripheral nervous system) symptoms include tingling or numbness in extremities, blurred vision, and stumbling.

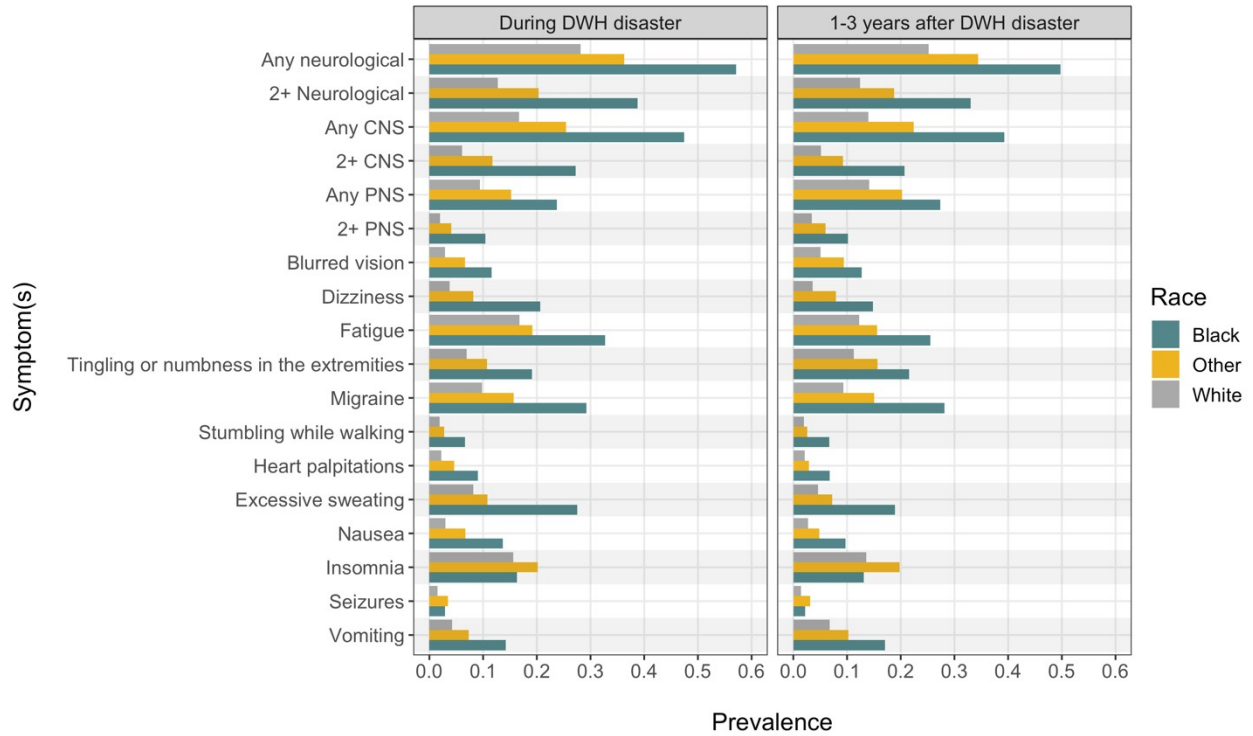

**Figure A4.** Prevalence of the outcomes (individual symptoms and aggregate outcomes) experienced during the *DWH* disaster (denominator n=9,044) and 1-3 years after the *DWH* disaster (denominator n=9,274), by self-identified race (Black, White, Other). Data on insomnia, seizures and vomiting were not ascertained for all participants, thus a different denominator was used (during *DWH* disaster: seizure – 6,109; vomit – 6,106; insomnia – 6,040; 1-3 years after disaster: seizure - 6,110; vomit – 6,121; insomnia – 4,701). CNS (central nervous system) symptoms include dizziness, sweating, palpitations, nausea, and migraine. PNS (peripheral nervous system) symptoms include tingling or numbness in extremities, blurred vision, and stumbling.

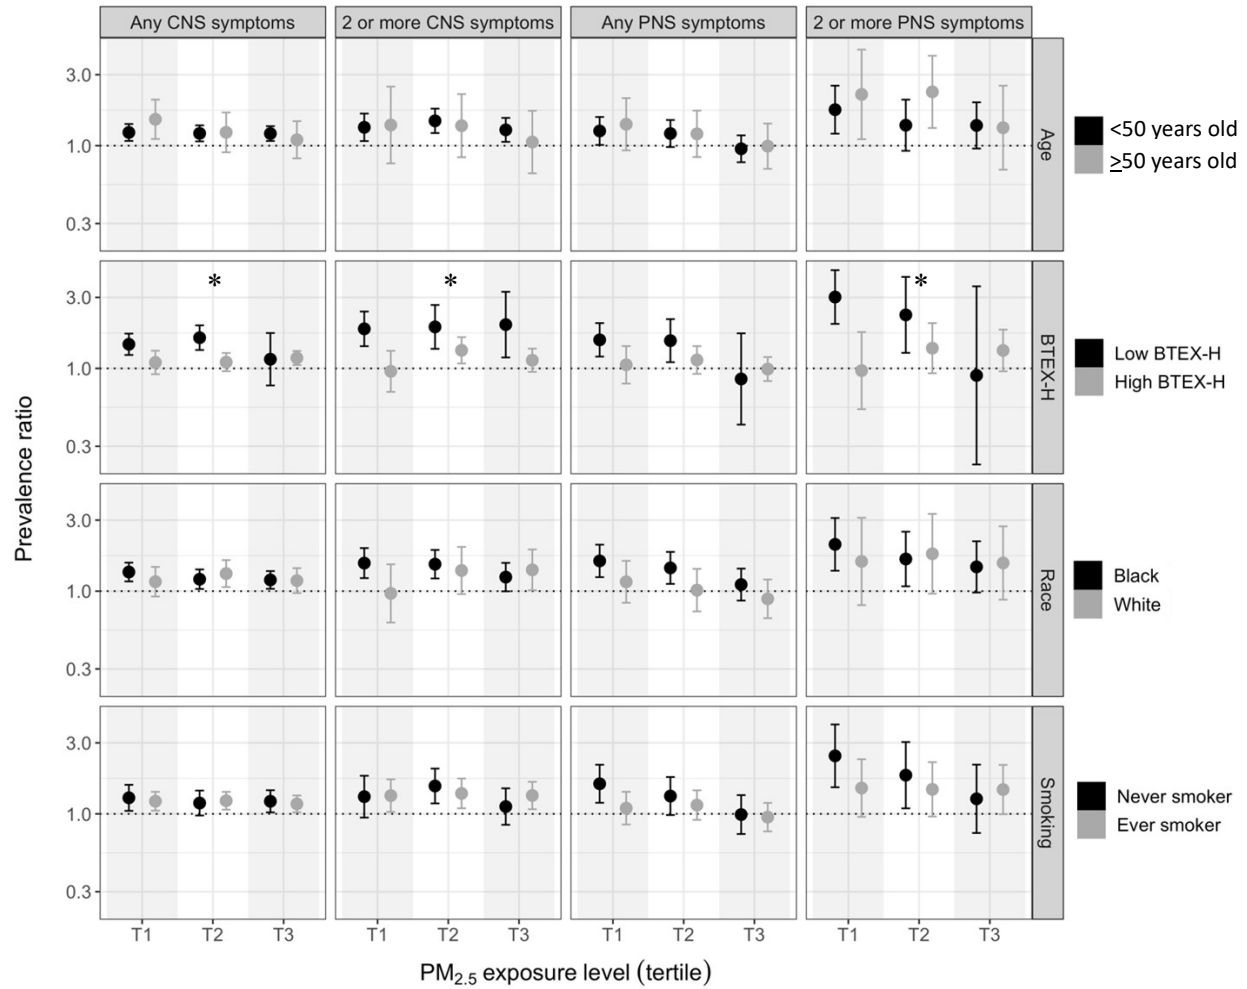

**Figure A5.** Prevalence ratios and 95% confidence limits for the relationship between tertiles of cumulative  $PM_{2.5}$  exposure for exposed individuals (T1,  $n=588$ ,  $PM_{2.5}$ : 10-679  $\mu\text{g}/\text{m}^3\text{-days}$ ; T2,  $n=602$ ,  $PM_{2.5}$ : 689-1378  $\mu\text{g}/\text{m}^3\text{-days}$ ; T3,  $n=779$ ,  $PM_{2.5}$ : 1406-4071  $\mu\text{g}/\text{m}^3\text{-days}$ ) compared to on-water workers with the lowest exposure ( $n=7026$ ,  $PM_{2.5}<1$   $\mu\text{g}/\text{m}^3\text{-days}$ ) and central (CNS) or peripheral (PNS) nervous system symptoms during the DWH disaster, stratified by (separately) age (< 50 vs.  $\geq 50$  years old); spill-related benzene, toluene, ethylbenzene, xylene and n-hexane (ppb-days; *low*=below median, *high*=above median); race (Black, White, Other [not shown]); and smoking status (never/ever). Models were adjusted for age (< 50 vs.  $\geq 50$  years old), quartiles of BTEX-H exposure (ppb-days) and race (White, Black, Other), except when that was the variable for stratification. CNS symptoms include dizziness, sweating, palpitations, nausea, and migraine. PNS symptoms include tingling or numbness in extremities, blurred vision, and stumbling. \*Likelihood ratio test comparing the main model to stratified models,  $p<0.05$

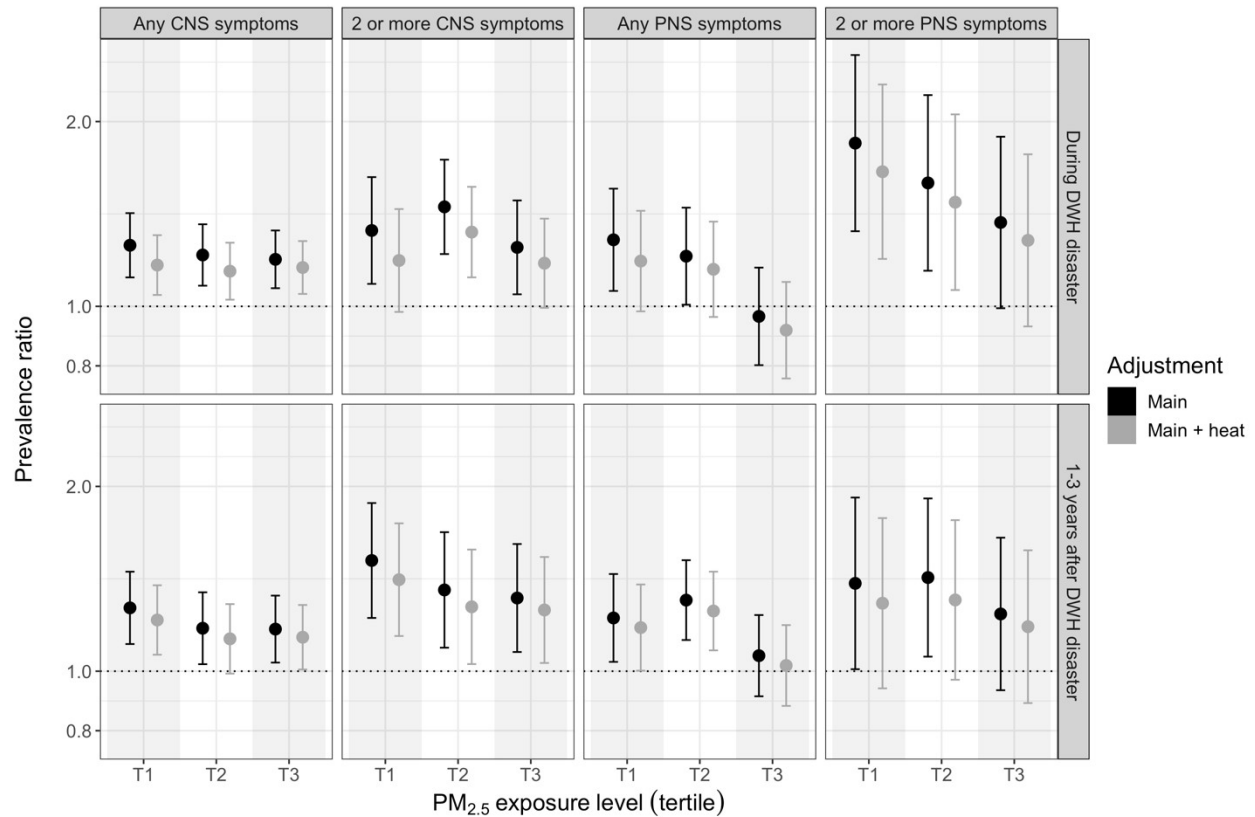

**Figure A6.** Prevalence ratios and 95% confidence limits for the relationship between tertiles of cumulative  $PM_{2.5}$  exposure for exposed individuals (T1, n=588,  $PM_{2.5}$ : 10-679  $\mu\text{g}/\text{m}^3\text{-days}$ ; T2, n=602,  $PM_{2.5}$ : 689-1378  $\mu\text{g}/\text{m}^3\text{-days}$ ; T3, n=779,  $PM_{2.5}$ : 1406-4071  $\mu\text{g}/\text{m}^3\text{-days}$ ) compared to on-water workers with the lowest exposure (n=7026,  $PM_{2.5}$ <1  $\mu\text{g}/\text{m}^3\text{-days}$ ) and central (CNS) or peripheral (PNS) nervous system symptoms. The main adjustment set includes age (< 50 vs.  $\geq$ 50 years old), race (Black, White, Other), and quartiles of spill-related benzene, toluene, ethylbenzene, xylene and n-hexane (ppb-days); some models were additionally adjusted for heat exposure. CNS symptoms include dizziness, sweating, palpitations, nausea, and migraine. PNS symptoms include tingling or numbness in extremities, blurred vision, and stumbling. \*Likelihood ratio test comparing the main model to stratified models,  $p < 0.05$

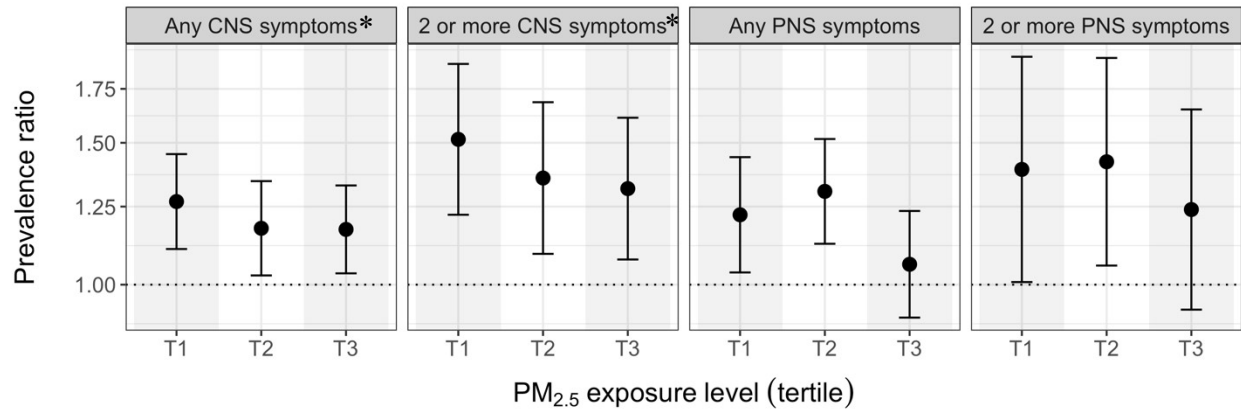

**Figure A7.** Prevalence ratios and 95% confidence limits for the relationship between tertiles of cumulative  $PM_{2.5}$  exposure for exposed individuals (T1,  $n=606$ ,  $PM_{2.5}$ :  $10-679 \mu\text{g}/\text{m}^3\text{-days}$ ; T2,  $n=618$ ,  $PM_{2.5}$ :  $689-1378 \mu\text{g}/\text{m}^3\text{-days}$ ; T3,  $n=801$ ,  $PM_{2.5}$ :  $1406-4071 \mu\text{g}/\text{m}^3\text{-days}$ ) compared to on-water workers with the lowest exposure ( $n=7201$ ,  $PM_{2.5} < 1 \mu\text{g}/\text{m}^3\text{-days}$ ) and central (CNS) or peripheral (PNS) nervous system symptoms 1-3 years after the DWH disaster. Models were adjusted for age ( $< 50$  vs.  $\geq 50$  years old), race (Black, White, Other), and quartiles of spill-related benzene, toluene, ethylbenzene, xylene and n-hexane (ppb-days). CNS symptoms include dizziness, sweating, palpitations, nausea, and migraine; PNS symptoms include tingling or numbness in extremities, blurred vision, and stumbling. \*Test of trend with a p-value  $< 0.05$ .

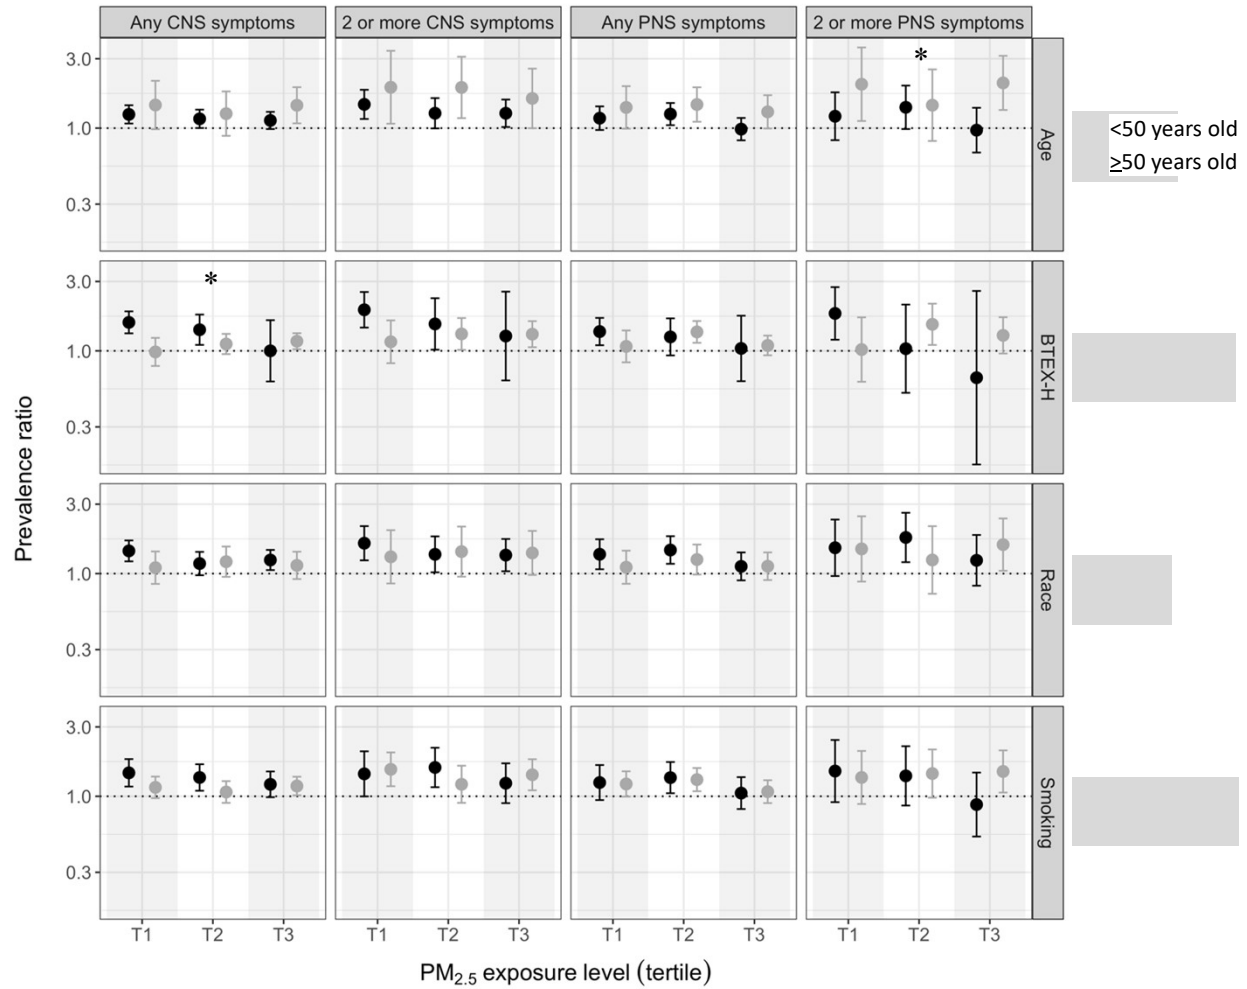

**Figure A8.** Prevalence ratios and 95% confidence limits for the relationship between tertiles of cumulative  $PM_{2.5}$  exposure for exposed individuals (T1,  $n=606$ ,  $PM_{2.5}$ :  $10-679 \mu\text{g}/\text{m}^3\text{-days}$ ; T2,  $n=618$ ,  $PM_{2.5}$ :  $689-1378 \mu\text{g}/\text{m}^3\text{-days}$ ; T3,  $n=801$ ,  $PM_{2.5}$ :  $1406-4071 \mu\text{g}/\text{m}^3\text{-days}$ ) compared to on-water workers with the lowest exposure ( $n=7201$ ,  $PM_{2.5} < 1 \mu\text{g}/\text{m}^3\text{-days}$ ) and central (CNS) or peripheral (PNS) nervous system symptoms 1-3 years after the DWH disaster, stratified by (separately) age (< 50 vs.  $\geq 50$  years old); spill-related benzene, toluene, ethylbenzene, xylene and n-hexane (ppb-days; *low*=below median, *high*=above median); race (Black, White, Other [not shown]); and smoking status (never/ever). Models were adjusted for age (< 50 vs.  $\geq 50$  years old), quartiles of BTEX-H exposure (ppb-days) and race (White, Black, Other), except when that was the variable for stratification. CNS symptoms include dizziness, sweating, palpitations, nausea, and migraine; PNS symptoms include tingling or numbness in extremities, blurred vision, and stumbling. \*Likelihood ratio test comparing the main model to stratified models,  $p < 0.05$ .

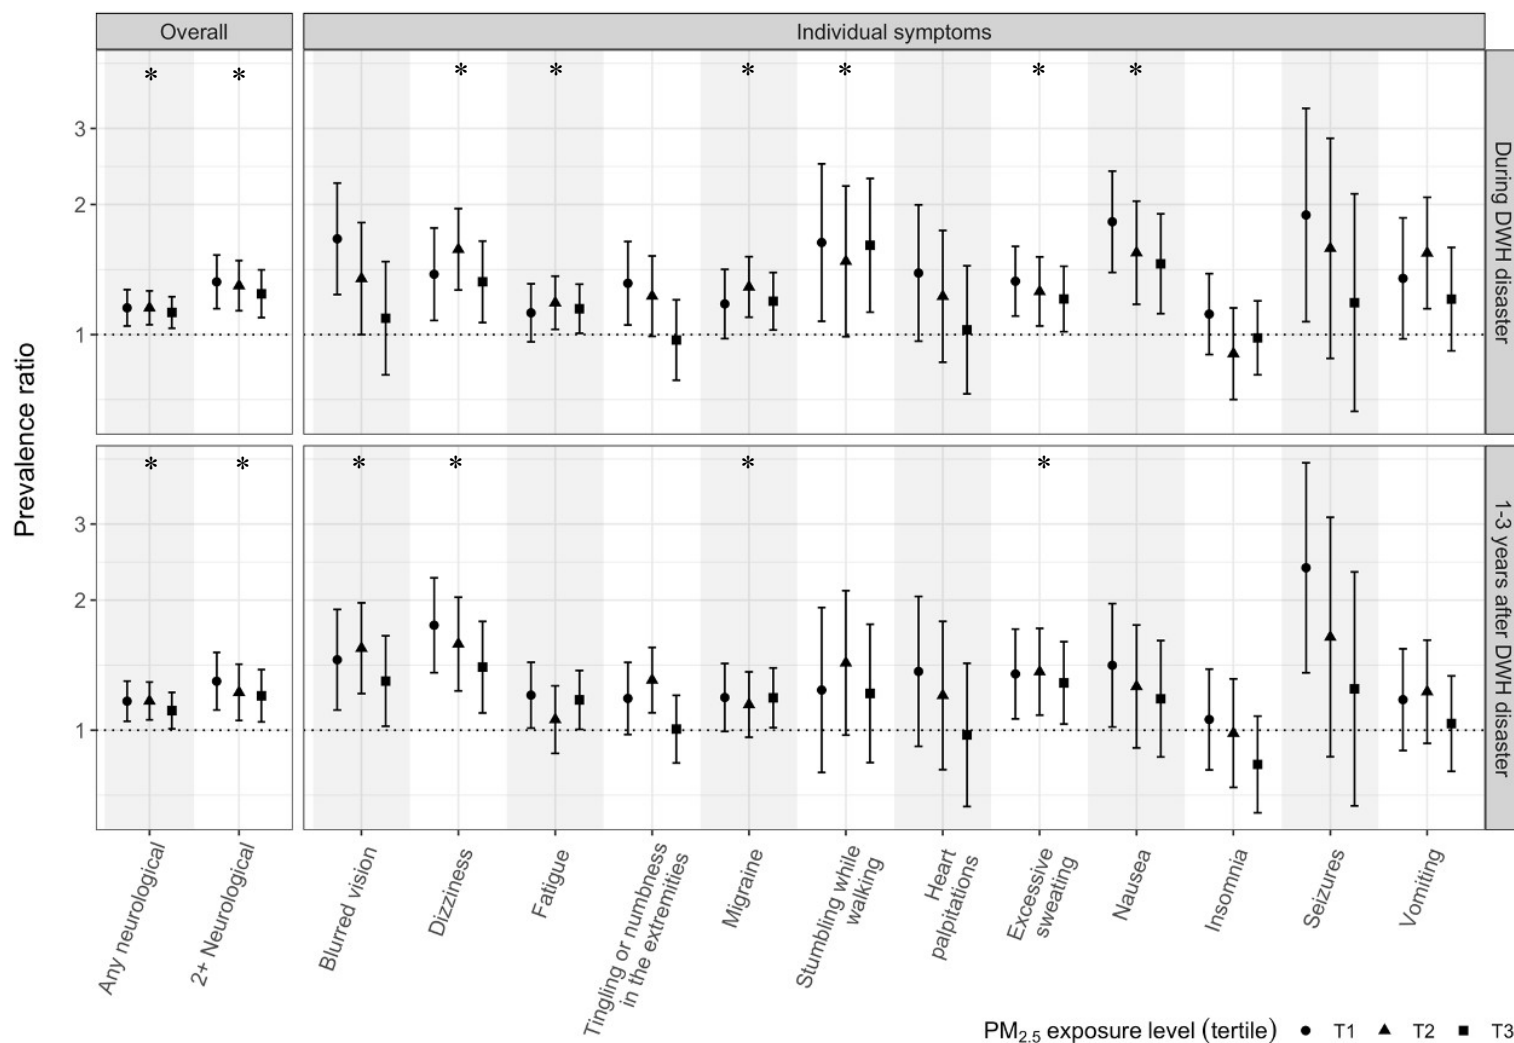

**Figure A9.** Prevalence ratios and 95% confidence limits for the relationship between tertiles of cumulative PM<sub>2.5</sub> exposure for exposed individuals (T1, PM<sub>2.5</sub>: 10-679 μg/m<sup>3</sup>-days; T2, PM<sub>2.5</sub>: 689-1378 μg/m<sup>3</sup>-days; T3, PM<sub>2.5</sub>: 1406-4071 μg/m<sup>3</sup>-days) compared to on-water workers with the lowest exposure (PM<sub>2.5</sub><1 μg/m<sup>3</sup>-days) and neurological symptoms. Models were adjusted for age (< 50 vs. ≥50 years old), race (Black,



White, Other), and quartiles of disaster-related benzene, toluene, ethylbenzene, xylene and n-hexane (ppb-days). \*Test of trend with a p-value of <0.05.
